# Supplementary material for: Genome-enabled phylogenetic and functional reconstruction of an araphid pennate diatom Plagiostriata sp. CCMP470, previously assigned as a radial centric diatom, and its bacterial commensal
Source: PubMed Central journal article supplement (PMC7287063; doi:10.1038/s41598-020-65941-x), 2020-06-10

A)

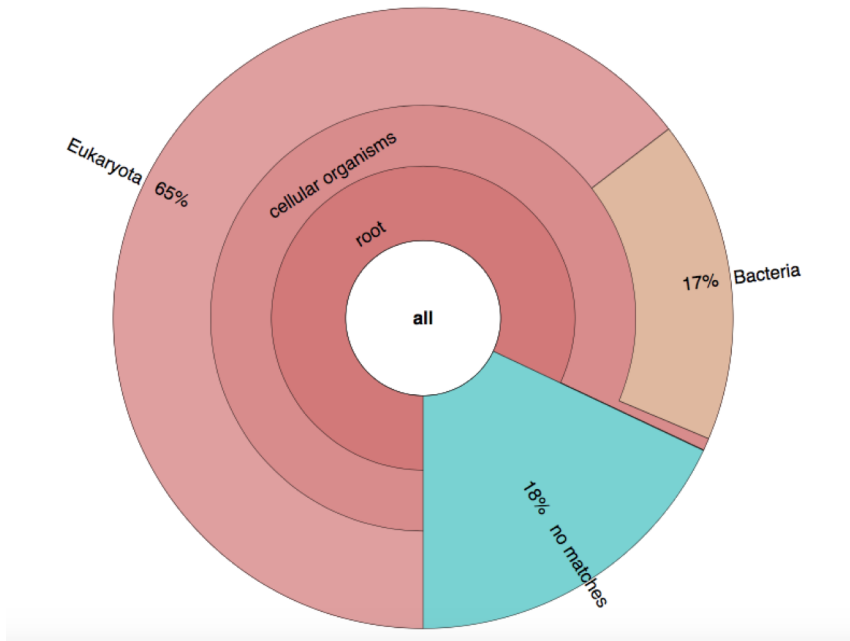

B)

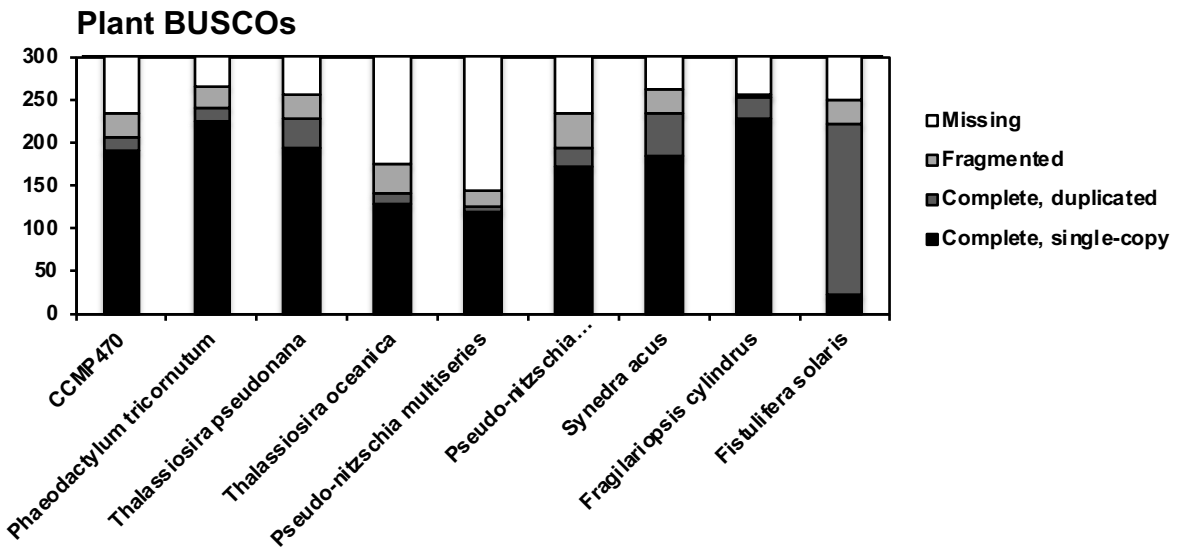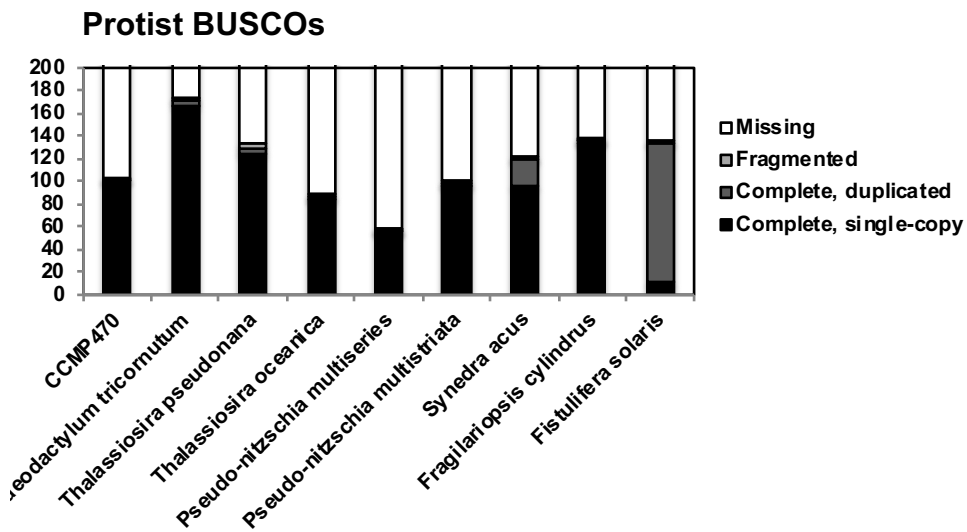

A)

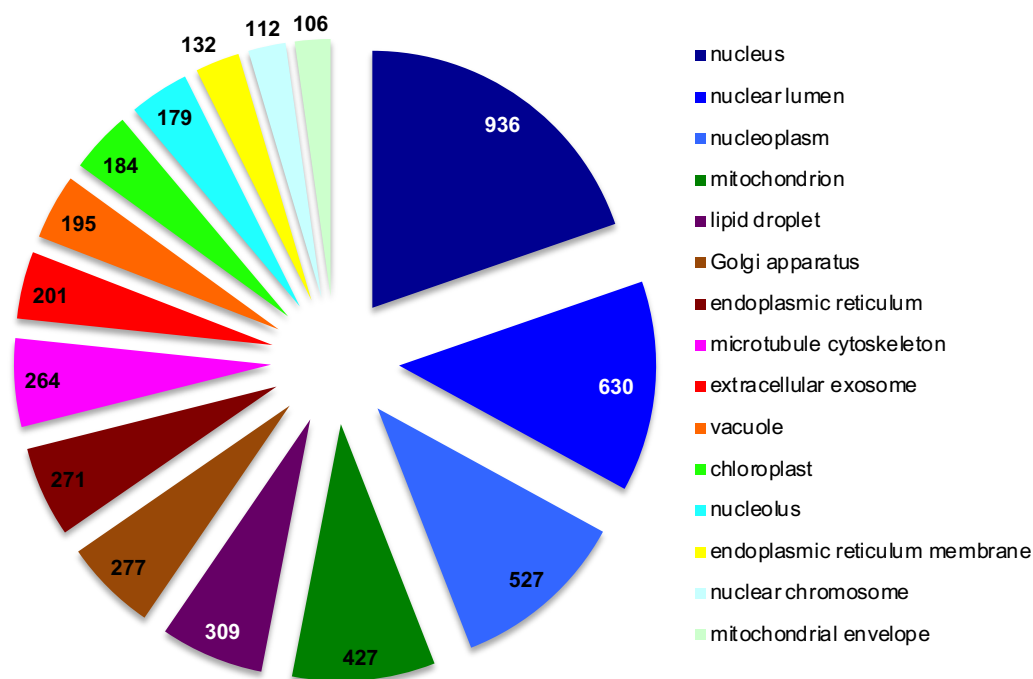

B)

| Species | Fc | Pt | To | Tp | CCMP470                                                         | Key |
|---------|----|----|----|----|-----------------------------------------------------------------|-----|
| PF00373 | .  | .  | .  | .  | FERM domain                                                     | 52  |
| PF01306 | .  | .  | .  | .  | LacY proton/sugar symporter                                     | 23  |
| PF01345 | .  | .  | .  | .  | Domain of unknown function DUF11                                | 10  |
| PF02434 | .  | .  | .  | .  | Glucosaminyltransferase/ NOTCH                                  | 7   |
| PF02653 | .  | .  | .  | .  | Branched-chain amino acid transport system / permease component | 5   |
| PF03825 | .  | .  | .  | .  | Nucleoside H <sup>+</sup> symporter                             | 0   |
| PF05753 | .  | .  | .  | .  | Translocon-associated protein beta (TRAPB)                      |     |
| PF07926 | .  | .  | .  | .  | TPR/MLP1/MLP2-like protein                                      |     |
| PF09037 | .  | .  | .  | .  | Stf0 sulfotransferase                                           |     |
| PF10712 | .  | .  | .  | .  | NAD-specific glutamate dehydrogenase                            |     |
| PF11496 | .  | .  | .  | .  | Class II histone deacetylase complex subunits 2 and 3           |     |
| PF13304 | .  | .  | .  | .  | AAA proteins                                                    |     |
| PF13360 | .  | .  | .  | .  | Methanol dehydrogenase PQQ-type domain                          |     |
| PF13429 | .  | .  | .  | .  | Tetratricopeptide repeat                                        |     |
| PF13604 | .  | .  | .  | .  | AAA proteins                                                    |     |
| PF00107 | ■  | ■  | ■  | ■  | Zinc-binding alcohol dehydrogenase                              |     |
| PF00132 | ■  | ■  | ■  | ■  | Bacterial transferase hexapeptide                               |     |
| PF00233 | ■  | ■  | ■  | ■  | 3'-5'-cyclic nucleotide phosphodiesterase                       |     |
| PF00612 | ■  | ■  | ■  | ■  | IQ calmodulin-binding motif                                     |     |
| PF01398 | ■  | ■  | ■  | ■  | JAB1/Mov34/MPN/PAD-1 ubiquitin protease                         |     |
| PF01535 | ■  | ■  | ■  | ■  | Pentatricopeptide repeat                                        |     |
| PF02146 | ■  | ■  | ■  | ■  | Sirtuin                                                         |     |
| PF02493 | ■  | ■  | ■  | ■  | MORN repeat                                                     |     |
| PF02798 | ■  | ■  | ■  | ■  | Glutathione S-transferase, N-terminal domain                    |     |
| PF02826 | ■  | ■  | ■  | ■  | D-isomer specific 2-hydroxyacid dehydrogenase                   |     |
| PF04408 | ■  | ■  | ■  | ■  | Helicase associated domain                                      |     |

A)

| Gene  | <i>Staurosira</i> complex | <i>Grammatophora oceanica</i> | <i>Synedra</i> RCC2510 | <i>Astrosyne radiata</i> | <i>Striatella unipunctata</i> |
|-------|---------------------------|-------------------------------|------------------------|--------------------------|-------------------------------|
| g8671 | 1                         |                               |                        |                          |                               |
| g8195 | 3                         |                               |                        |                          |                               |
| g7750 | 1                         | 1                             |                        |                          |                               |
| g7216 |                           |                               | 1                      |                          |                               |
| g4562 | 1                         |                               |                        | 1                        | 1                             |

B)

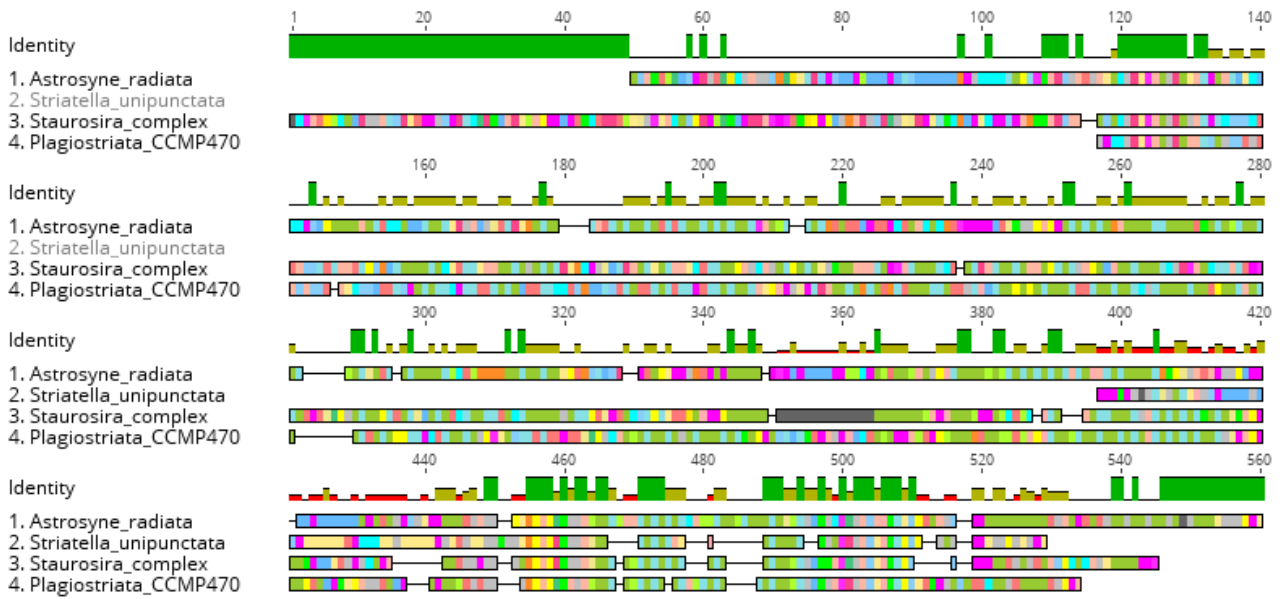

A)

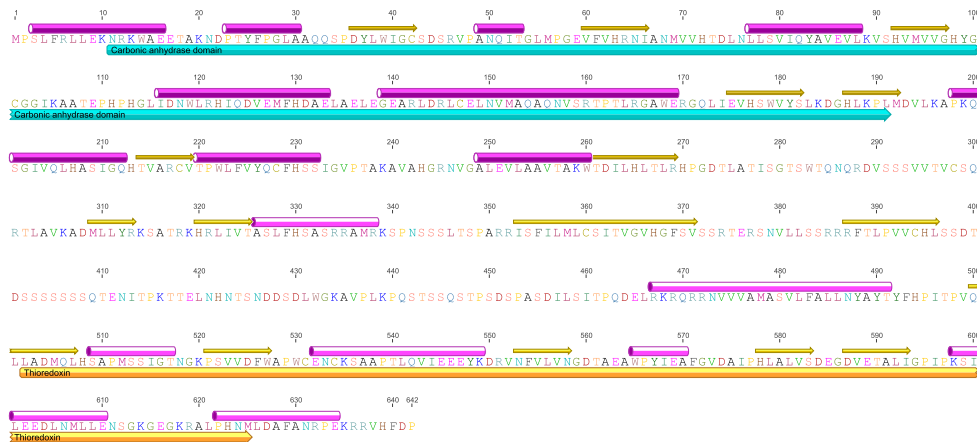

Jpred structure:

α-helix   
 β-sheet

B)

NTD

CTD

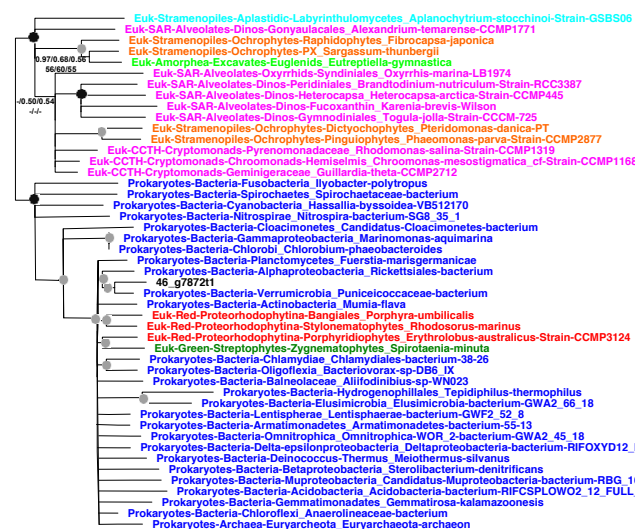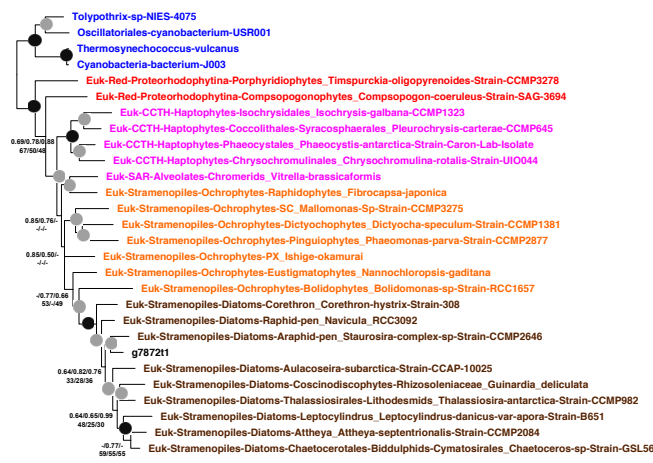

**Key**

- CCMP470
- Prokaryotes
- Diatoms
- Other ochrophytes
- Other algae with plastids of secondary red origin
- Algae with plastids of secondary green origin
- Aplastidic SAR clade members
- Red algae
- Green algae

0.2

0.3

A)

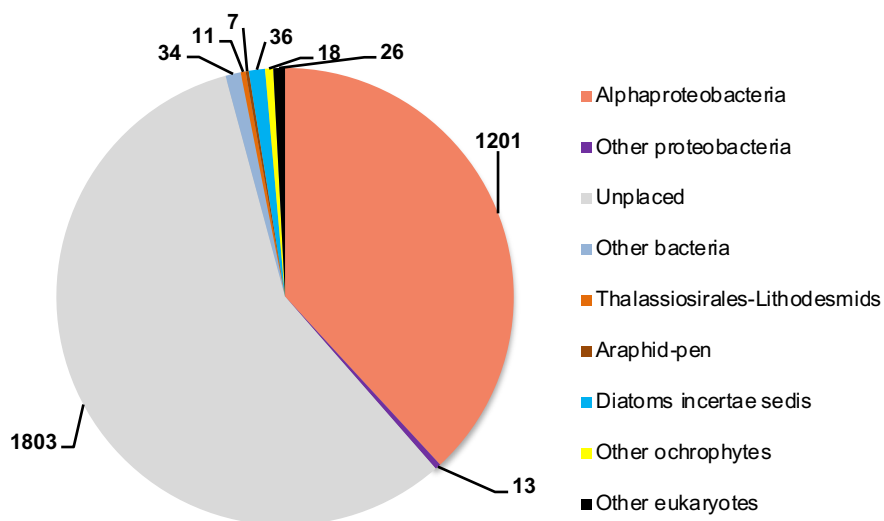

B)

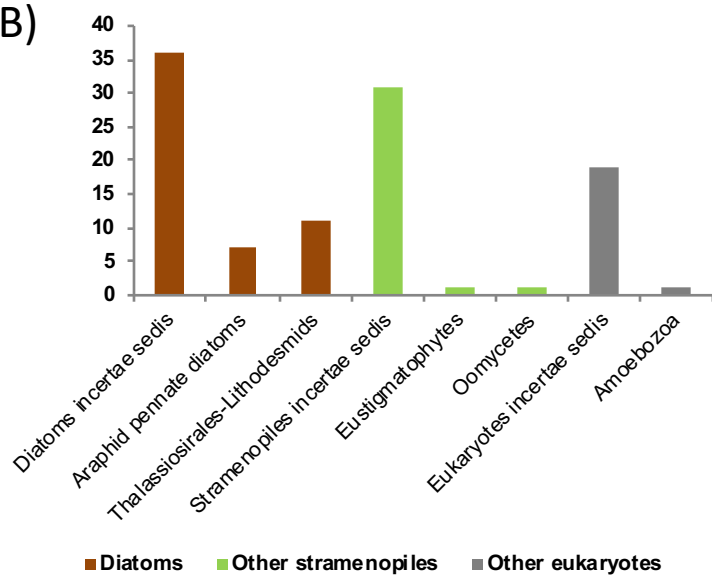

Supplement: 41598_2020_65941_MOESM5_ESM.pdf [file 41598_2020_65941_MOESM5_ESM.pdf]
